# Supplementary material for: Repetitive elements and enforced transcriptional repression co-operate to enhance DNA methylation spreading into a promoter CpG-island
Source: PubMed Central journal article supplement — Nucleic Acids Res. 2012 May 17;40(15):7257–68. doi: 10.1093/nar/gks429 (PMC3424568; doi:10.1093/nar/gks429), 2012-05-17
Supplement: supp_gks429_nar-00384-x-2012-File008.pdf [file supp_gks429_nar-00384-x-2012-File008.pdf]

**Supplementary  
Figure 1**

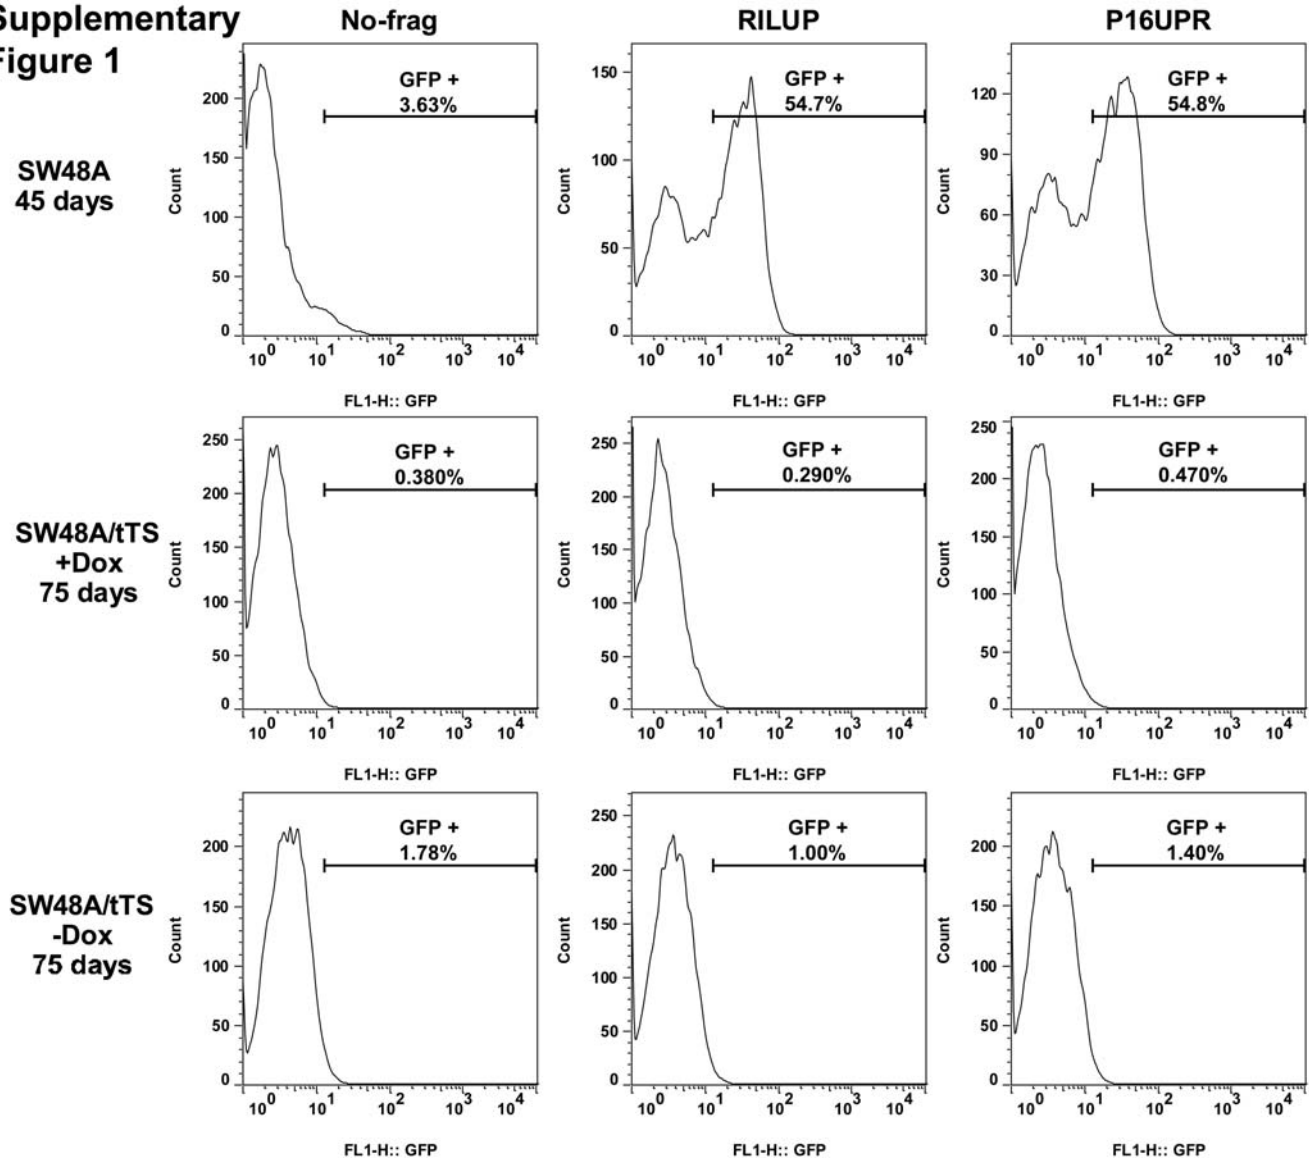

## Supplementary Figure 2

**A**

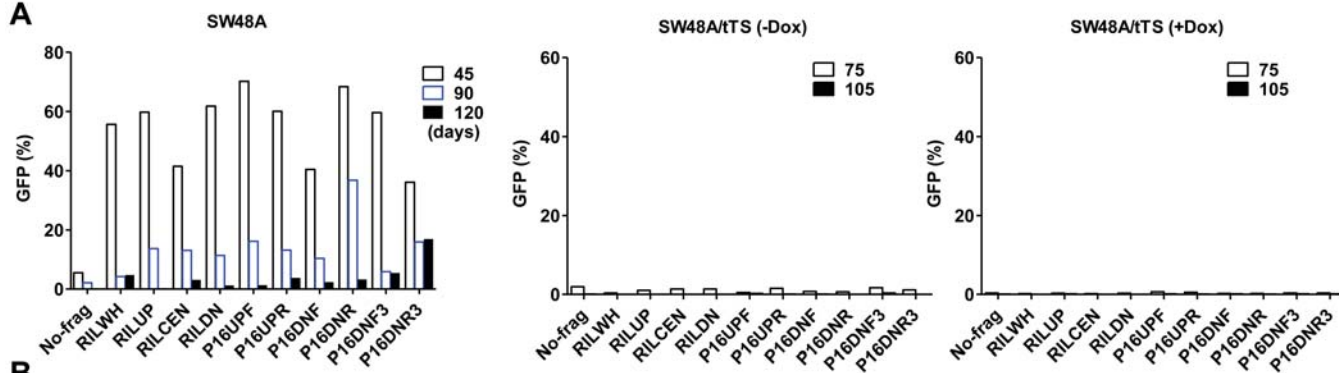

**B**

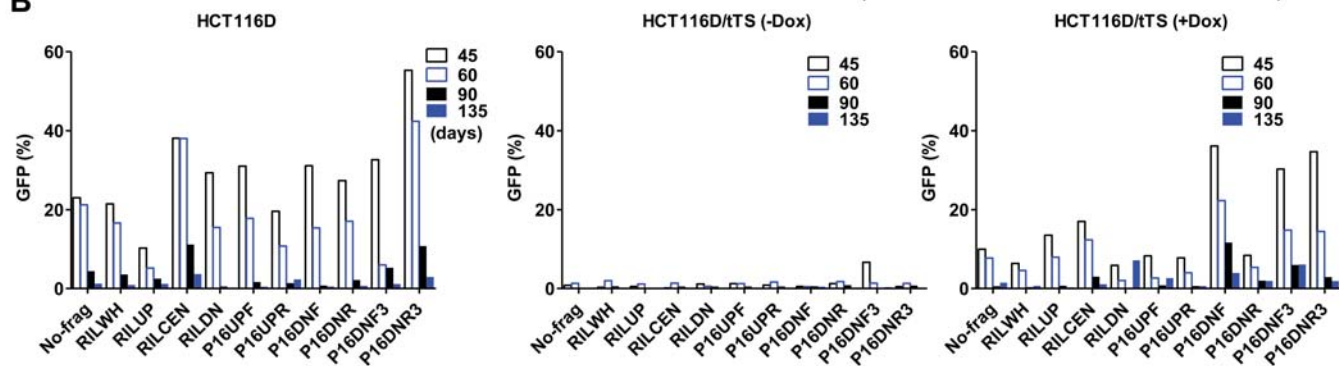

# Supplementary Figure 3

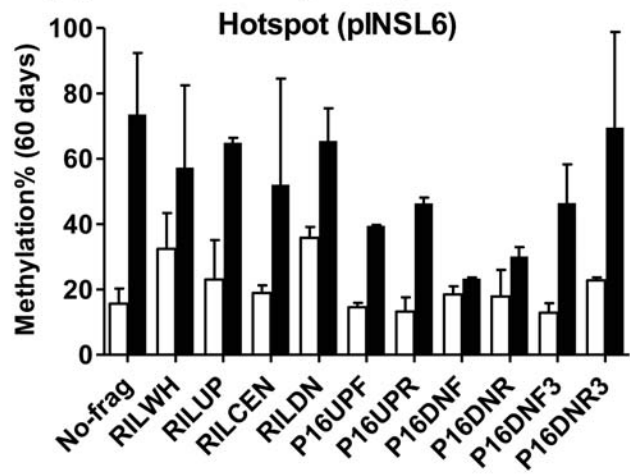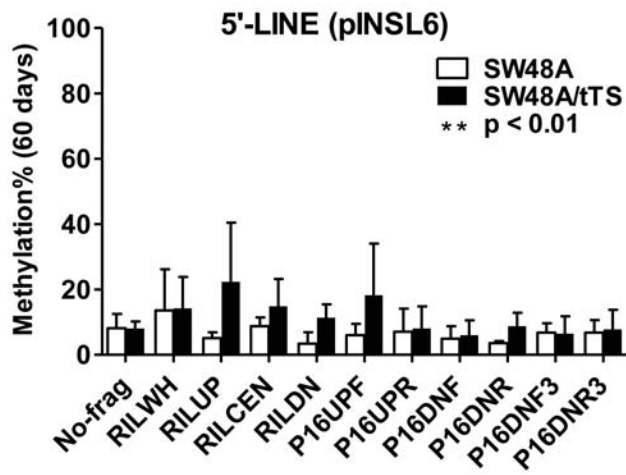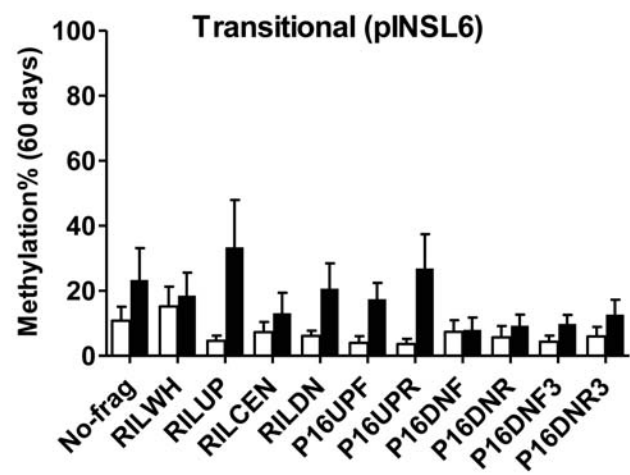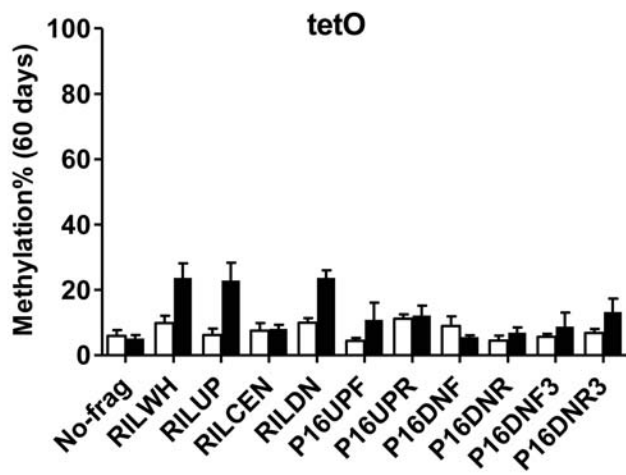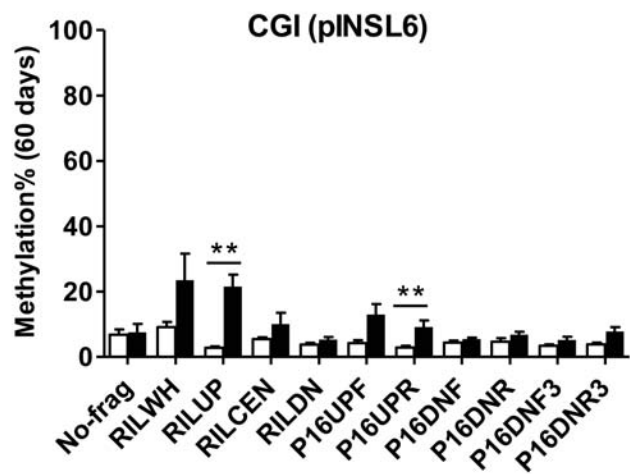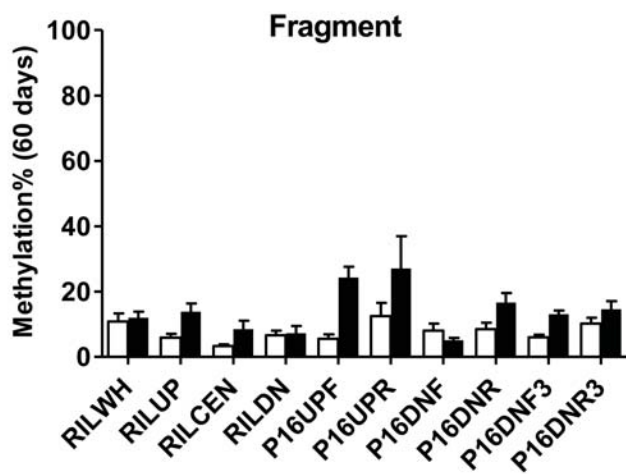

# Supplementary Figure 4

**A**

**75 days**

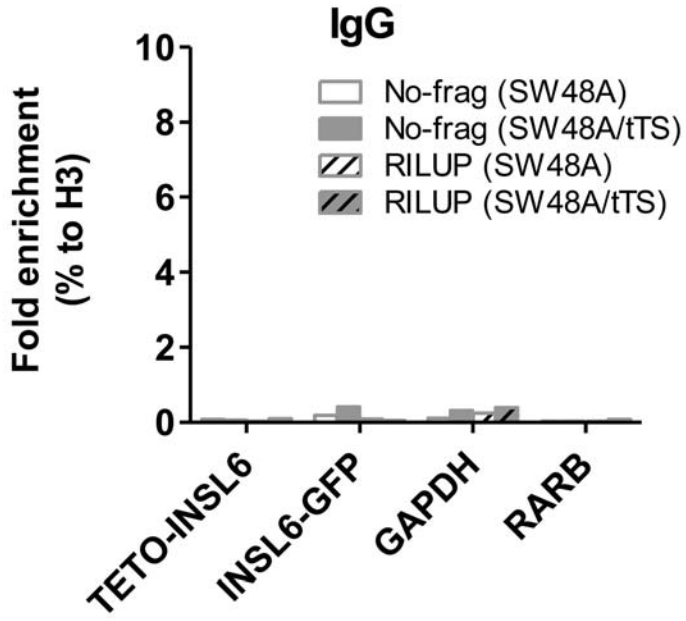

**B**

**180 days**

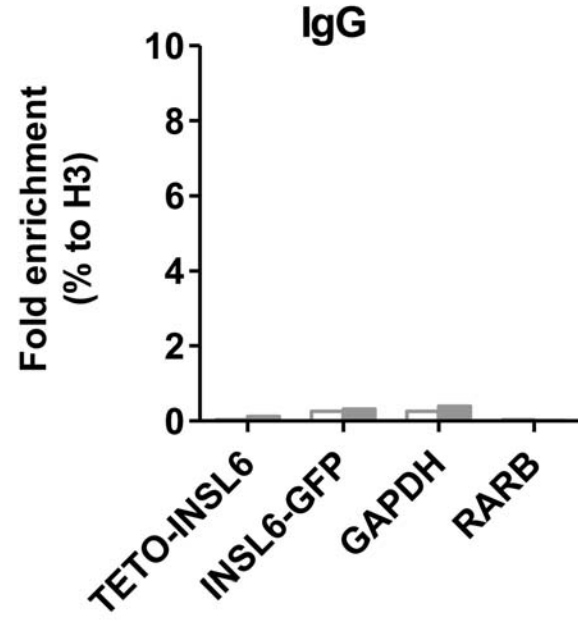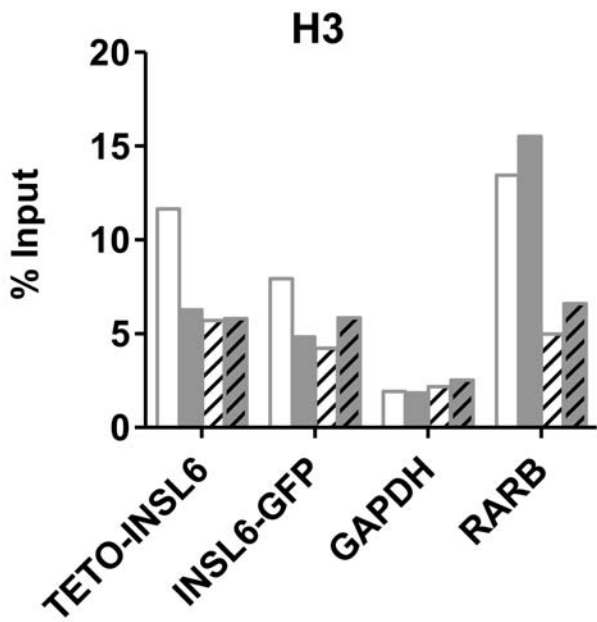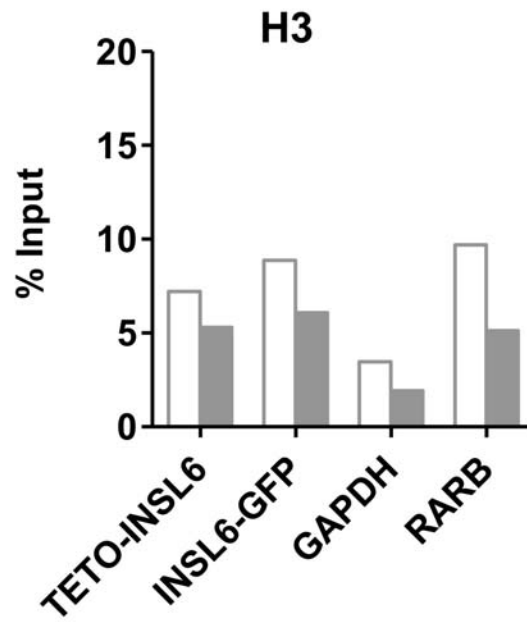

# Supplementary Figure 5

**A**

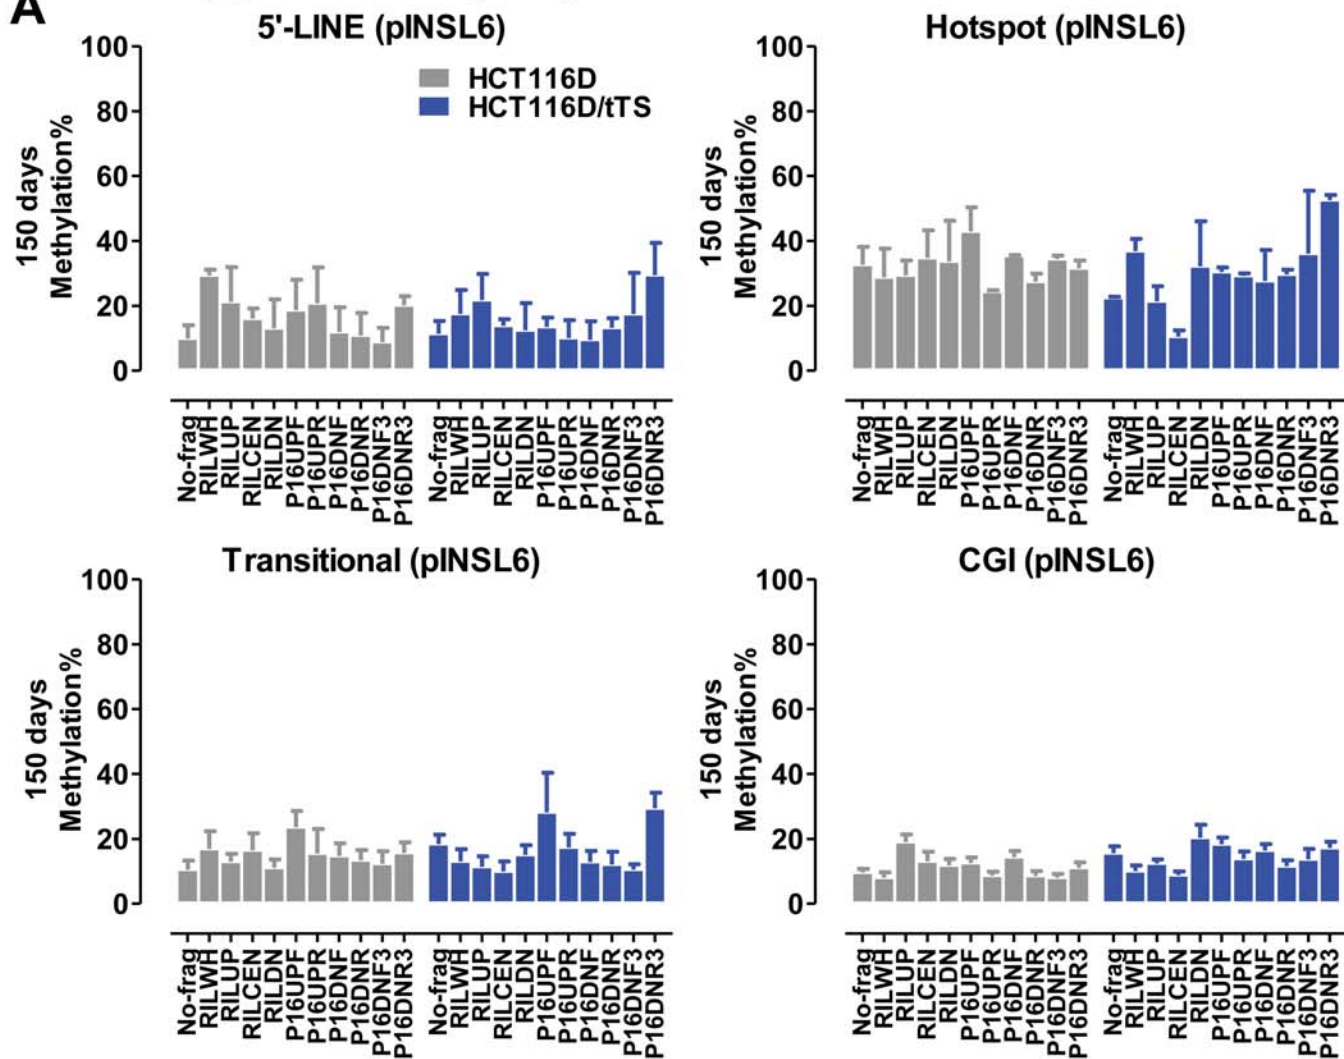

**B**

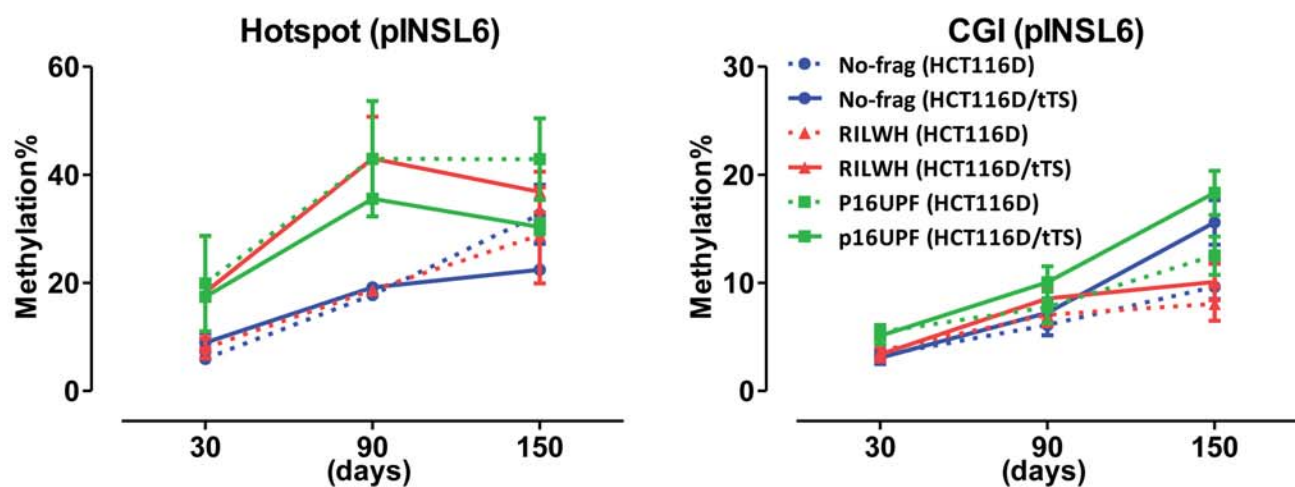

**Supplementary figure 1.** Flow cytometry graphs to exemplify transgene expression in Flp-in or Flp-in/tTS cells at the earliest available time points (45 days for SW48A and 75 days for SW48A/tTS). Three transgenes (No-frag, RILUP and P16UPR) are shown here, and please refer to Supplementary Fig. 2 for more transgenes and other time points.

**Supplementary figure 2.** The function of tTS in accelerating GFP silencing. GFP expression was measured by flow cytometry. Stable single clones were sampled at several time points from 45 days to 135 days after transfection. For Flp-in/tTS host cells, clones were cultured in media with and without doxycycline (Dox) respectively. (A) SW48A and SW48A/tTS as host cells; (B) HCT116D and HCT116D/tTS as host cells. GFP expression in long-term cultured tTS-containing clones presented partial inducibility in response to doxycycline, and maintaining clones under doxycycline did not prevent GFP from silencing in the long run.

**Supplementary figure 3.** Comparing the methylation profiles of pINSL6 in SW48A/tTS and SW48A cells (60 days). \*\*, significantly different methylation of each transgene between host cells ( $p < 0.01$ ).

**Supplementary figure 4.** ChIP-qPCR to analyze the H3 occupancy and IgG affinity in pINSL6. All the values of fold enrichment were normalized to H3 and H3 occupancy was calculated as the percentage of input. GAPDH and RARB as the control regions. TETO-INSL6 and INSL6-GFP are targets designed at the 5'-end and 3'-end of pINSL6 in order

to distinguish it from the endogenous one. (A) Two transgenes (No-frag and RILUP) examined in SW48A and SW48A/tTS at 75 days. (B) The transgene (No-frag) examined in SW48A and SW48A/tTS at 180 days.

**Supplementary figure 5.** Methylation profiles of pINSL6 of transgenes in HCT116D and HCT116D/tTS. Pyrosequencing was used to detect regional methylation patterns as described before. (A) Methylation in HCT116D/tTS and HCT116D, sampled at 150 days. Error bar, SEM. (B) Gradual accumulation of transgene methylation. Three time points (30, 90 and 150 days) are shown for three transgenes (No-frag, RILWH and P16UPF).

**Supplementary table 1.** PCR primers and sequencing primers used for bisulfite-sequencing and pyrosequencing.

| Name           | Step | Forward                             | Reverse                                  | Sequencing                                                         | Target Sequence                                                   | Ta (°C)   | Size (bp) |
|----------------|------|-------------------------------------|------------------------------------------|--------------------------------------------------------------------|-------------------------------------------------------------------|-----------|-----------|
| BSP            | 1°   | GGTAYGATGGAAAGTAAG<br>AATAG         | TCCAAC <del>T</del> CRACCAAAATAA<br>ACAC | NA                                                                 | NA                                                                | 50-58(53) | 642       |
| INSGFP-<br>P1  | 1°   | GGTAYGATGGAAAGTAAG<br>AATAG         | TCCAAC <del>T</del> CRACCAAAATAA<br>ACAC |                                                                    |                                                                   | 53        | 642       |
|                | 2°   | GTAAGATGGAAAGTAAGA<br>ATAGA         | U-<br>AAAAACCCCCTATCATCTC<br>T           | TAAGTTTATAAATGGAA<br>ATA<br>AGGTTTTTGT <del>TTTT</del> TATGA<br>AG | GGTYGATTAATATYGTG<br>AAA<br>YGGGGGTTTTAGGAAAG<br>AGGTTATAYGTTTTAT | 50-61(58) | 128       |
| INSGFP-<br>P2  | 1°   | GGTAYGATGGAAAGTAAG<br>AATAG         | TCCAAC <del>T</del> CRACCAAAATAA<br>ACAC |                                                                    |                                                                   | 53        | 642       |
|                | 2°   | *U-<br>TAGGAGTAGATAGGGAGT<br>AGG    | CTCCACCAAAATAAACAC                       | AACCCCAA <del>A</del> CTAATCCT                                     | CCRCRTTATACAATAAC                                                 | 50-61(58) | 200       |
| INSGFP-<br>P3  | 1°   | GGTAYGATGGAAAGTAAG<br>AATAG         | TCCAAC <del>T</del> CRACCAAAATAA<br>ACAC |                                                                    |                                                                   | 53        | 642       |
|                | 2°   | U-<br>TGAGGGAGAAGAAGTTTT<br>ATTAA   | CCCCCTAATTTAATTCATT<br>T                 | TCCCTCCACCTAAAATA<br>C<br>AATAAAAAATTCCTCAC<br>CA                  | RTTTCTCR <del>TTCT</del> TATTTA<br>AACRTAAAAACA                   | 54        | 174       |
| INSGFP-<br>P4  | 1°   | GGTAYGATGGAAAGTAAG<br>AATAG         | TCCAAC <del>T</del> CRACCAAAATAA<br>ACAC |                                                                    |                                                                   | 53        | 642       |
|                | 2°   | U-<br>TTTTGGTTTTTATTTTAGG<br>AGTTAG | CCCCTTACTACCATAATA<br>AC                 | CCAACCCTACTCCCTAT<br>C                                             | TACRCCTACRCCAAACC<br>RAACRACRCRCAC                                | 50-62(58) | 329       |
| tetOINS-<br>P1 | 1°   | TTYGGGATTTGGTATTTAG<br>TTG          | CCGGAAACTCATAACCTA<br>AACTC              |                                                                    |                                                                   | 50-58(55) | 707       |
|                | 2°   | AGGGATTTGGTATTTAGTT<br>GGTAATT      | U-<br>ACCCATACCTCCCTATAAAA<br>CCAATAA    | TGGTAATTA <del>A</del> AATATGTG<br>GTG                             | AAAYGTTTAAGTGTGTA<br>TATGGTTATGTGYGTTTA<br>GTTA                   | 50-62(58) | 129       |
| tetOINS-<br>P2 | 1°   | TTYGGGATTTGGTATTTAG<br>TTG          | CCGGAAACTCATAACCTA<br>AACTC              |                                                                    |                                                                   | 50-58(55) | 707       |
|                | 2°   | TTGAGGTATTTGGGATGG<br>AAATT         | U-<br>CAAATCCTCTAAAAATCCC<br>TATCACA     | GGATGGAAATTTGGTTT<br>T                                             | TTYGGTTAGATAA                                                     | 50-62(58) | 99        |
| tetOINS-<br>P3 | 1°   | TTYGGGATTTGGTATTTAG<br>TTG          | CCGGAAACTCATAACCTA<br>AACTC              |                                                                    |                                                                   | 50-58(55) | 707       |
|                | 2°   | GATAATTTGTTTAGTTAG<br>GA            | U-<br>AAACTCATAACCTAAACTC                | TTTATTATTGATAGGGA<br>GTAAAT                                        | TYGATATAYGTTTTTTAT<br>TA                                          | 50-58(58) | 390       |
| RILWH-P1       | 1°   | ATGAAGAATTTGTTTAGGG<br>TTAGG        | U-<br>AAACATTCAAACCTTCTCT<br>TACTACTTA   | AGATGTAAGGGTTAGAT<br>ATA                                           | YGYGTTGATATTGATTAT<br>TG                                          | 50-58.9   | 198       |
| RILWH-P2       | 1°   | GTTTAGTGTGGTGGAATTT<br>TGTAG        | AACRCRAACCCAAACCC<br>AAC                 |                                                                    |                                                                   | 58-62(58) | 487       |
|                | 2°   | GGTGGTTTGAGAGGAGTT<br>TGTA          | U-<br>TATCCACACCCACCCTTTA                | TTTTTATAAGGTAGGA<br>TGG                                            | GTYGTAGGTGTGTTAGT<br>YGGGTTTAT                                    | 50-62(60) | 401       |



|           |    |                                 |                                       |                          |                                   |  |           |     |
|-----------|----|---------------------------------|---------------------------------------|--------------------------|-----------------------------------|--|-----------|-----|
|           |    |                                 | AAATC                                 |                          |                                   |  |           |     |
| RILUP-P2  | 1° | TAGTGTGGTGGAAATTTGT<br>AGA      | CACTATACTAAAACTACC<br>CCAA            |                          |                                   |  | 52-62(55) | 394 |
|           | 2° | AGAAGGTTTGAATGTTTTG<br>GGGAAGTA | U-<br>TACCCCAACTCAAATACCT<br>CCTCATAA | TTTTTTATAAGGTAGGA<br>TGG | YGYGTTGATATTGATTAT<br>TG          |  | 50-62(58) | 286 |
| RILCEN-P  | 1° | GTTTAGTGTGGTGGAAATT<br>TGTA     | ACCCTCCCCTTCRAAAAA<br>CTCT            |                          |                                   |  | 50-62(55) | 319 |
|           | 2° | AGGTGTAGATAGTTGGGT<br>TTGGG     | U-<br>CACACCCCACTCAACTC<br>TC         | AAGGTTAGAGTAGGATT<br>TAG | GTYGTYGGGGTYGTTYG<br>AAYGYGGGGATT |  | 50-62(55) | 113 |
| RILDN-P1  | 1° | ATGAAGAATTTGTTTAGGG<br>TTAGG    | U-<br>ATCCACAATAACTCCCCCA<br>ATA      | AGATGTAAGGGTTAGAT<br>ATA | YGYGTTGATATTGATTAT<br>TG          |  | 58        | 333 |
| RILDN-P2  | 1° | TAGTGTGGTGGAAATTTGT<br>AGA      | CRAAAACCCCAAACCTCC<br>CTAAA           |                          |                                   |  | 58        | 421 |
|           | 2° | U-<br>TTTGGGGGAGTTATTGTG<br>GAT | CAAAACCCCAAACCTCCC<br>TAAAT           | CCCCTAACCCATCTC          | CRCRAATCCTTCCCRAA<br>TCCAC        |  | 60        | 196 |
| P16UPF-P1 | 1° | ATGAAGAATTTGTTTAGGG<br>TTAGG    | U-<br>TAAACACCCTCCACTAATC<br>A        | AGATGTAAGGGTTAGAT<br>ATA | YGYGTTGATATTGATTAT<br>TG          |  | 58        | 96  |
| P16UPF-P2 | 1° | TGAAGAATTTGTTTAGGGT<br>TAGG     | ATCTCTCCACCACCCTCC                    |                          |                                   |  | 50        | 548 |
|           | 2° | TTTTAGGTTGGAGTGTAAAT<br>G       | U-<br>CTCTATAATCCCAACATTC<br>T        | GTAGTTGGGATTATAGG<br>TAT | GYGTTATTAAGTTTYGTT<br>AATTTTG     |  | 50-55     | 243 |
| P16UPF-P3 | 1° | TGAAGAATTTGTTTAGGGT<br>TAGG     | ATCTCTCCACCACCCTCC                    |                          |                                   |  | 50        | 548 |
|           | 2° | YGTTATGTTGGTTAGGTTT             | U-<br>ATCTCTCCACCACCCTCC<br>A         | TTAGAATGTTGGGATTA<br>TAG | AYGTGAGTTATYGTATTY<br>GGATTTT     |  | 52-58     | 207 |
| P16UPR-P1 | 1° | ATGAAGAATTTGTTTAGGG<br>TTAGG    | U-<br>ATCCCTTCCCCCTTTATA<br>ATTAC     | AGATGTAAGGGTTAGAT<br>ATA | YGYGTTGATATTGATTAT<br>TG          |  | 58        | 166 |
| P16UPR-P2 | 1° | TGAAGAATTTGTTTAGGGT<br>TAGG     | CACACRTACRCCACCATA<br>ACCAA           |                          |                                   |  | 50        | 501 |
|           | 2° | GGGGTTGTTGTGAGTTTA<br>AATGAT    | U-<br>TACCCACCATAACCAACT<br>AATT      | AATTTTAGTATTTTGGG<br>AAG | TYGAGGYGGGTAGATTA<br>TTTGAGG      |  | 50-55     | 306 |
| P16DNF-P1 | 1° | ATGAAGAATTTGTTTAGGG<br>TTAGG    | U-<br>ACCACAAATTTCCACTAAT<br>AATCC    | AGATGTAAGGGTTAGAT<br>ATA | YGYGTTGATATTGATTAT<br>TG          |  | 58        | 114 |
| P16DNF-P2 | 1° | TGAAGAATTTGTTTAGGGT<br>TAGG     | CTAAAACATAAACTCCAAC<br>CAC            |                          |                                   |  | 58        | 601 |
|           | 2° | GGAGGGATTATTAGTGGA<br>AATTTG    | U-<br>TTCTTTCCACAAAATCTCA<br>CTCTA    | AGGTTGAGGTAGGAGA<br>AT   | YGTTTGAATTYGGGAGG<br>TTG          |  | 60        | 370 |
| P16DNR-   | 1° | ATGAAGAATTTGTTTAGGG             | U-                                    | AGATGTAAGGGTTAGAT        | YGYGTTGATATTGATTAT                |  | 58        | 466 |

|               |    |                                |                                    |                             |                                                   |       |     |
|---------------|----|--------------------------------|------------------------------------|-----------------------------|---------------------------------------------------|-------|-----|
| P1            |    | TTAGG                          | CCCTTATAATCCCTTCACT<br>TTAAA       | ATA                         | TG                                                |       |     |
| P16DNR-<br>P2 | 1° | AATTTYGGTTYGAGTTTAG<br>GGTAT   | TCAAACRATTCTCCTACCT<br>CAACC       |                             |                                                   | 58    | 335 |
|               | 2° | GTGTTGGATATTAGGAGG<br>GATTAT   | U-<br>CCACCCCCCACTACTTTTT<br>ATAT  | TGATAGAAATTATTTAG<br>AAG    | YGGTYGGGYGYGGTGT<br>TTAYGTTTTGTAA                 | 58-62 | 241 |
| EGFP-P        | 1° | AAGGAAGAAGGTAATTATA<br>AGA     | U-<br>CCAACCTTATACCCCAAAAT         | GGAAGAAGGTAATTATA<br>AGA    | TTYGYGTGAGGTGAAG<br>TTYGAGGGYGATAT                | 50-52 | 124 |
| HYG-P         | 1° | AGGGTGTTAAGTTGTAAG<br>ATT      | U-<br>TCCCCCATATAAAATCAC           | AATTGTTAGTTGTTTTGT<br>AG    | TYGGTYGYGGAGGTTAT<br>GGATGYGATYTTGYGG<br>TYGATTTT | 50-52 | 174 |
| siteD-P1      | 1° | GTAAGAGTAGAAATAGGG<br>GAAGA    | U-<br>CATCTCCCCTTAACCTCACA<br>A    | AATTAGTTTTTTTTTTAT<br>GA    | YGGAGTAAGGATGGAGA<br>ATAAGGATATYGGTTTA            | 50-58 | 277 |
| siteD-P2      | 1° | AGAGATGTAGTAGGTAGT<br>TGGATATA | U-<br>AATTAACCAACTACTTAC<br>ATATTC | TTTTATAGTATAAGTTTA<br>TAGGG | TAYGAAGAATGAATTTTG<br>AGAATGTTTGG                 | 50-58 | 75  |
| siteA-P1      | 1° | AGTGATTTGGGGATAAG<br>A         | U-<br>TCTTTCACCACTTAATTA<br>TC     | TTATGATAGATATTTGG<br>TAA    | AYGATGGAAATGT                                     | 50-52 | 78  |
| siteA-P2      | 1° | AGTTTAGGTTTTTGAATG<br>TAG      | U-<br>TTATTTACTCACCTTCTTTA<br>CAT  | TGTATTTAGGTTAATTTA<br>TG    | TTGTATTTGAATTYGAYG<br>TTAA                        | 50-52 | 243 |
| Zeo-P1        | 1° | AAGTAGTGATTGGGAAAA<br>T        | U-<br>CATTCCCCATTCAAATA            | ATTGGGAAAATTTTGG            | YGTTATTTAATTTAATYG<br>TT                          | 50    | 138 |
| Zeo-P2        | 1° | GGTTGATTAATTTTTTTAT<br>TTATGT  | U-<br>AAACTTCCAATAATAACT<br>TCTC   | TTTTTTTTATTTATGTAG<br>AG    | GTYGAGGTGTTTYGGT<br>TT                            | 50-52 | 120 |

\*U-: Biotin-labeled universal primer (GGGACACCGCTGATCGTTTA).

**Supplementary table 2.** Realtime-PCR primers and probes used for ChIP analysis.

| Name      | Forward                         | Reverse                        | Probe                 | Amplicon(bp) |
|-----------|---------------------------------|--------------------------------|-----------------------|--------------|
| SiteA     | TGCTGTATTTGAATCCGACGTT          | GCCTTGGATGGAAGAACAAATC         | ATCTGAAAGGAATCC<br>CT | 69           |
| SiteD     | AACTTCACAAACATATACTCTGCT<br>GAT | GACGGAGCAAGGATGGAGAA           | CTAGACCGGTGTCCT<br>T  | 67           |
| TETO-INSL | GGCGTGTACGGTCATACTTAAGG         | GGTGAGATAATTTTGCTCAGTT<br>AGGA | TCTCTCGAGCCCCTT<br>C  | 85           |
| INSL-GFP  | GCCGACCGCCATTGC                 | ACTGCAGAATTCGAAGCTTACT<br>TAGA | TCACAGGAGATCTGC       | 79           |
| ACTB      | TCCCCTCCTTTTGCGAAAA             | CGGCCAACGCCAAAAC               | AGCGAGATTGAGGAA<br>GA | 78           |
| GAPDH     | CTGCTCCTCCTGTTTCGACAGT          | TCACCTGGCGACGCAA               | AGCCGCATCTTC          | 52           |
| RARB      | TTGGAAGGAGAACTTGGGATCTT         | AGGCTTGCTCGGCCAATC             | CTGGGAACCCCC          | 85           |

**Supplementary table 3.** Fragments subcloned into transgenes.

| Fragments | Distance to TSS (Gene)         | Subcloned length (bp) | CG sites | Orientation |
|-----------|--------------------------------|-----------------------|----------|-------------|
| RILWH     | -713 to +664 (RIL)             | 1421                  | 96       | Forward     |
| RILUP     | -713 to -378 (RIL)             | 336                   | 11       | Forward     |
| RILCEN    | -406 to +237 (RIL)             | 643                   | 66       | Forward     |
| RILDN     | +214 to +664 (RIL)             | 451                   | 20       | Forward     |
| P16UPF    | -1752 to -804 (P16)            | 980                   | 33       | Forward     |
| P16UPR    | -1752 to -804 (P16)            | 980                   | 33       | Reverse     |
| P16DNF    | +768 to +1248 (P16)            | 511                   | 18       | Forward     |
| P16DNR    | +768 to +1248 (P16)            | 511                   | 18       | Reverse     |
| P16DNF3   | (+768 to +1248)x3 copies (P16) | 1485                  | 18x3     | Forward     |
| P16DNR3   | (+768 to +1248)x3 copies (P16) | 1485                  | 18x3     | Reverse     |
